# Supplementary material for: Development of the Active Ageing Awareness Questionnaire in Malaysia
Source: MDPI journal article supplement (doi:10.3390/healthcare9050499), 2021-04-22
Supplement: s1 [file s1]

## Article

# Development of the Active Ageing Awareness Questionnaire in Malaysia

Nor Hana Ahmad Bahuri <sup>1</sup>, Hussein Mohammad Rizal <sup>2</sup>, Hazreen Abdul Majid <sup>2</sup>, Mas Ayu Said<sup>3\*</sup> and Tin Tin Su <sup>4</sup>

<sup>1</sup> Department of Social and Preventive Medicine, Faculty of Medicine, University of Malaya, 50603 Kuala Lumpur, Malaysia; drhannadrph@gmail.com (N.H.A.B)

<sup>2</sup> Centre for Population Health (CePH), Department of Social and Preventive Medicine, Faculty of Medicine, University of Malaya, 50603 Kuala Lumpur, Malaysia; husseinriz@um.edu.my (H.R.); hazreen@ummc.edu.my (H.A.M.)

<sup>3</sup> Centre for Epidemiology and Evidence-Based Practice, Department of Social and Preventive Medicine, Faculty of Medicine, University of Malaya, 50603 Kuala Lumpur, Malaysia

<sup>4</sup> South East Asia Community Observatory (SEACO), Jeffrey Cheah School of Medicine & Health Sciences, Monash University, Bandar Sunway, 47500 Subang Jaya, Selangor, Malaysia; TinTin.Su@monash.edu (T.T.S)

\* Correspondence: mas@ummc.edu.my

**Supplementary Table S1.** English and Malay translation and reasons for exclusion of the Awareness of Active Ageing Questionnaire (AAAQ)

| Item No. | Item Text (English)                                                          | Item Text (Malay)                                                                                                                  | I-CVI <sup>a</sup> | ICC <sup>b</sup> | EFA <sup>c</sup> | CFA <sup>d</sup> | Reason for Exclusion                                                           |
|----------|------------------------------------------------------------------------------|------------------------------------------------------------------------------------------------------------------------------------|--------------------|------------------|------------------|------------------|--------------------------------------------------------------------------------|
| 1        | In your opinion, what are the factors that make someone age actively?        | Pada pendapat anda, apakah faktor yang membolehkan seseorang itu menua secara aktif?                                               | 1.00               | -                | -                | -                | Included (open-ended item)                                                     |
| 2        | In Malaysia, at what age a person is called as an 'older person'?            | Di Malaysia, pada umur berapakah seseorang itu dikatakan 'warga emas'?                                                             | 0.67               | -                | -                | -                | Excluded I-CVI consensus (open-ended item)                                     |
| 3        | Have you ever heard about 'active ageing'?                                   | Pernahkah anda mendengar mengenai 'penuaan aktif'?                                                                                 | 1.00               | -                | -                | -                | Included (open-ended item)                                                     |
| 4        | Free from chronic diseases such as diabetes mellitus or heart disease        | Bebas dari penyakit kronik seperti kencing manis atau penyakit jantung                                                             | 1.00               | 0.634            | 0.586            | 0.55             | Included                                                                       |
| 5        | Chronic diseases or diseases which is/are under controlled                   | Mempunyai penyakit kronik yang terkawal                                                                                            | 1.00               | 0.628            | 0.239            | -                | Low factor loading for CFA                                                     |
| 6        | Able to move around freely with or without disability or physical limitation | Tidak mempunyai masalah untuk bergerak ke mana-mana tidak kira samada mempunyai kecacatan anggota / masalah fizikal atau pun tidak | 1.00               | 0.696            | 0.601            | 0.59             | Included                                                                       |
| 7        | Regular physical activity or exercise                                        | Melakukan aktiviti fizikal atau senaman secara berkala                                                                             | 1.00               | 0.486            | 0.779            | 0.77             | Included                                                                       |
| 8        | Not smoking (cigarette, e-cigarette, pipes, cigar)                           | Tidak merokok (rokok dan "vaping")                                                                                                 | 1.00               | 0.788            | 0.654            | -                | Excluded, modification indices more than 15 indicate redundant with covariates |
| 9        | Eating healthy food                                                          | Makan makanan yang sihat                                                                                                           | 1.00               | 0.624            | 0.882            | 0.87             | Included                                                                       |
| 10       | Not consuming alcoholic beverages                                            | Tidak mengambil minuman beralkohol                                                                                                 | 1.00               | 0.722            | 0.821            | 0.84             | Included                                                                       |
| 11       | Good oral health                                                             | Tiada masalah kesihatan gigi                                                                                                       | 1.00               | 0.712            | 0.738            | 0.75             | Included                                                                       |
| 12       | Healthy minds                                                                | Mempunyai minda yang sihat                                                                                                         | 1.00               | 0.690            | 0.886            | 0.86             | Included                                                                       |
| 13       | Good memory                                                                  | Daya ingatan yang bagus                                                                                                            | 1.00               | 0.584            | 0.867            | -                | Excluded cross-loading EFA                                                     |
| 14       | Not feeling lonely                                                           | Tidak merasa kesepian                                                                                                              | 1.00               | 0.677            | 0.754            | 0.74             | Included                                                                       |
| 15       | Continue working (part-time or full time) after compulsory retirement        | Meneruskan pekerjaan selepas tempoh persaraan wajib                                                                                | 1.00               | 0.751            | 0.340            | -                | Low factor loading for CFA                                                     |

|    |                                                                                |                                                                             |      |       |       |      |                                                                                |
|----|--------------------------------------------------------------------------------|-----------------------------------------------------------------------------|------|-------|-------|------|--------------------------------------------------------------------------------|
| 16 | Participate in voluntary activity. For example, volunteer in Flood Relief Team | Menyertai aktiviti kemanusiaan. Contohnya sukarelawan Bantuan Mangsa Banjir | 1.00 | 0.629 | 0.498 | 0.63 | Included                                                                       |
| 17 | Participate in social and community activity                                   | Terlibat dengan aktiviti sosial dan kemasyarakatan                          | 1.00 | 0.737 | 0.687 | 0.76 | Included                                                                       |
| 18 | Providing care for other older person                                          | Menjaga orang yang lebih tua dari kita                                      | 1.00 | 0.739 | 0.417 | -    | Low factor loading for CFA                                                     |
| 19 | Providing care for grandchildren                                               | Menjaga cucu                                                                | 1.00 | 0.754 | 0.064 | -    | Low factor loading for CFA                                                     |
| 20 | Having a hobby such as gardening, fishing or baking                            | Mempunyai hobi seperti berkebun, memancing dan membuat kuih                 | 1.00 | 0.728 | 0.742 | 0.82 | Included                                                                       |
| 21 | Continue learning new things                                                   | Sentiasa belajar perkara-perkara baru                                       | 1.00 | 0.608 | 0.742 | 0.81 | Included                                                                       |
| 22 | Have a good amount of saving for retirement                                    | Mempunyai wang simpanan yang mencukupi untuk bersara                        | 1.00 | 0.540 | 0.825 | 0.73 | Included                                                                       |
| 23 | Have own house                                                                 | Mempunyai tempat tinggal sendiri                                            | 1.00 | 0.787 | 0.923 | 0.82 | Included                                                                       |
| 24 | Safe living conditions                                                         | Tempat tinggal yang selamat                                                 | 1.00 | 0.691 | 0.974 | -    | Excluded, modification indices more than 15 indicate redundant with covariates |
| 25 | Safe neighbourhood                                                             | Persekitaran kejiranan yang selamat                                         | 1.00 | 0.699 | 0.956 | -    | Excluded cross-loading EFA                                                     |

Item Content Validity Index (I-CVI)—number of experts rating of three total number of experts.

<sup>a</sup>— Items with I-CVI  $\leq 0.69$  were excluded,  $0.69 < \text{I-CVI} < 0.90$  were individually assessed, I-CVI  $\geq 0.90$  were retained

Inter-item Correlation (ICC)—test-retest were conducted to assess the initial reliability of the questionnaire

<sup>b</sup>— Items with ICC was classified as: poor ( $< 0.4$ ), fair to good ( $0.4$  to  $< 0.75$ ) and excellent ( $\geq 0.75$ )

Exploratory Factor Analysis

<sup>c</sup>—Bartlett's test of sphericity with a significance level of less than 0.5 and a KMO of more than 0.7 or nearly 1.0 indicate that the items are suitable for structure detection and factor analysis and are useful for further analysis

Confirmatory Factor Analysis

<sup>d</sup>— Dimensionality is achieved when all the items have a factor loading of more than 0.5

Bold items are included in the final AAAQ. The grey cells indicate that items were excluded in the validation process.

Item 4-25— Items are rated according to a 4-point Likert scale from strongly disagree to strongly agree on what makes someone age actively
